# Supplementary material for: Differences in speciation progress in feather mites (Analgoidea) inhabiting the same host: the case of Zachvatkinia and Alloptes living on arctic and long-tailed skuas
Source: PubMed Central journal article supplement (PMC4274374; doi:10.1007/s10493-014-9856-1), 2014-10-24
Supplement: 10493_2014_9856_MOESM1_ESM.pdf [file 10493_2014_9856_MOESM1_ESM.pdf]

**Table A1. Feather mites (FM) sampled from arctic skua used for molecular study.**

| Sample ID | FM specimen & DNA code | COI haplotype | GenBank Acc. nos. |          | FM species                  |
|-----------|------------------------|---------------|-------------------|----------|-----------------------------|
|           |                        |               | COI               | 28S rDNA |                             |
| T01p      | Env481                 | H18           | KF018867          |          | <i>Zachvatkinia isolata</i> |
|           | Env482                 | H30           | KF018868          |          | <i>Z. isolata</i>           |
|           | Env484                 | H18           | KF018869          |          | <i>Z. isolata</i>           |
|           | Env485                 | H1            | KF018870          |          | <i>Z. isolata</i>           |
|           | Env480                 | H59           | KF018860          |          | <i>Alloptes stercorarii</i> |
| T02p      | Env478                 | H31           | KF018866          |          | <i>Z. isolata</i>           |
|           | Env479                 | H54           | KF018820          | KJ804194 | <i>Z. stercorarii</i>       |
| T03p      | Env470                 | H58           | KF018830          |          | <i>A. stercorarii</i>       |
|           | Env471                 | H57           | KF018831          |          | <i>A. stercorarii</i>       |
|           | Env472                 | H57           | KF018832          |          | <i>A. stercorarii</i>       |
|           | Env473                 | H57           | KF018833          | KJ804203 | <i>A. stercorarii</i>       |
| T04p      | Env546                 | H31           | KF018827          |          | <i>Z. isolata</i>           |
|           | Env547                 | H34           | KF018862          |          | <i>Z. isolata</i>           |
|           | Env548                 | H29           | KF018863          |          | <i>Z. isolata</i>           |
|           | Env549                 | H53           | KF018864          | KJ804196 | <i>Z. isolata</i>           |
| T05p      | Env574                 | H25           | KF018906          | KJ804195 | <i>Z. isolata</i>           |
|           | Env576                 | H39           | KF018907          |          | <i>Z. isolata</i>           |
| T06g      | lack of sequence data  |               |                   |          |                             |
| T06p      | Env551                 | H31           | KF018890          |          | <i>Z. isolata</i>           |
|           | Env552                 | H13           | KF018891          |          | <i>Z. isolata</i>           |
|           | Env553                 | H28           | KF018892          |          | <i>Z. isolata</i>           |
|           | Env554                 | H1            | KF018893          |          | <i>Z. isolata</i>           |
| T07g      | lack of sequence data  |               |                   |          |                             |
| T07p      | Env441                 | H52           | KF018861          |          | <i>Z. isolata</i>           |
| T08g      | empty sample           |               |                   |          |                             |
| T08p      | Env536                 | H7            | KF018881          |          | <i>Z. isolata</i>           |
|           | Env538                 | H21           | KF018882          |          | <i>Z. isolata</i>           |
|           | Env539                 | H49           | KF018883          |          | <i>Z. isolata</i>           |
|           | Env540                 | H17           | KF018884          |          | <i>Z. isolata</i>           |
|           | Env469                 | H57           | KF018859          |          | <i>A. stercorarii</i>       |
|           | Env583                 | H60           | KF018829          |          | <i>A. stercorarii</i>       |
| T09g      | Env532                 | H1            | KF018879          |          | <i>Z. isolata</i>           |
|           | Env533                 | H53           | KF018880          |          | <i>Z. isolata</i>           |
| T09p      | Env556                 | H9            | KF018894          |          | <i>Z. isolata</i>           |
|           | Env557                 | H19           | KF018895          |          | <i>Z. isolata</i>           |
| T10g      | Env524                 | H51           | KF018876          |          | <i>Z. isolata</i>           |
|           | Env528                 | H48           | KF018877          |          | <i>Z. isolata</i>           |
| T10p      | Env570                 | H32           | KF018902          |          | <i>Z. isolata</i>           |
|           | Env571                 | H1            | KF018903          |          | <i>Z. isolata</i>           |
|           | Env572                 | H24           | KF018904          | KJ804201 | <i>Z. isolata</i>           |
|           | Env573                 | H24           | KF018905          |          | <i>Z. isolata</i>           |
| T11g      | lack of sequence data  |               |                   |          |                             |
| T11p      | Env560                 | H31           | KF018896          |          | <i>Z. isolata</i>           |
|           | Env562                 | H26           | KF018897          |          | <i>Z. isolata</i>           |
|           | Env564                 | H35           | KF018898          |          | <i>Z. isolata</i>           |
|           | Env565                 | H38           | KF018899          |          | <i>Z. isolata</i>           |
| T12g      | Env520                 | H53           | KF018872          |          | <i>Z. isolata</i>           |
|           | Env521                 | H31           | KF018873          |          | <i>Z. isolata</i>           |

|      |        |     |          |          |                       |
|------|--------|-----|----------|----------|-----------------------|
|      | Env522 | H46 | KF018874 |          | <i>Z. isolata</i>     |
|      | Env523 | H19 | KF018875 |          | <i>Z. isolata</i>     |
| T12p | Env566 | H44 | KF018900 |          | <i>Z. isolata</i>     |
|      | Env569 | H53 | KF018901 | KJ804197 | <i>Z. isolata</i>     |
| T13g | Env447 | H45 | KF018887 |          | <i>Z. isolata</i>     |
|      | Env448 | H15 | KF018888 |          | <i>Z. isolata</i>     |
|      | Env449 | H1  | KF018889 |          | <i>Z. isolata</i>     |
|      | Env450 | H3  | KF018865 |          | <i>Z. isolata</i>     |
| T13p | Env577 | H27 | KF018908 |          | <i>Z. isolata</i>     |
|      | Env578 | H22 | KF018909 |          | <i>Z. isolata</i>     |
|      | Env579 | H6  | KF018910 |          | <i>Z. isolata</i>     |
|      | Env580 | H1  | KF018911 |          | <i>Z. isolata</i>     |
| T14g | Env529 | H54 | KF018821 |          | <i>Z. stercorarii</i> |
|      | Env530 | H54 | KF018822 |          | <i>Z. stercorarii</i> |
|      | Env531 | H54 | KF018878 |          | <i>Z. stercorarii</i> |
| T14p | Env541 | H36 | KF018885 |          | <i>Z. isolata</i>     |
|      | Env544 | H41 | KF018886 |          | <i>Z. isolata</i>     |
| T15g | Env412 | H14 | KF018828 |          | <i>Z. isolata</i>     |
| T16g | Env517 | H1  | KF018871 |          | <i>Z. isolata</i>     |
