# Supplementary material for: Differences in speciation progress in feather mites (Analgoidea) inhabiting the same host: the case of Zachvatkinia and Alloptes living on arctic and long-tailed skuas
Source: PubMed Central journal article supplement (PMC4274374; doi:10.1007/s10493-014-9856-1), 2014-10-24
Supplement: 10493_2014_9856_MOESM2_ESM.pdf [file 10493_2014_9856_MOESM2_ESM.pdf]

**Table A2. Feather mites (FM) sampled from long-tailed skua used for molecular study.**

| Sample ID | FM specimen & DNA code | COI haplotype | GenBank acc. nos. |          | FM species                  |
|-----------|------------------------|---------------|-------------------|----------|-----------------------------|
|           |                        |               | COI               | 28S rDNA |                             |
| F01p      | Env491                 | H10           | KF018841          |          | <i>Zachvatkinia isolata</i> |
| F02p      | Env417                 | H44           | KF018836          |          | <i>Z. isolata</i>           |
|           | Env418                 | H43           | KF018837          |          | <i>Z. isolata</i>           |
|           | Env420                 | H37           | KF018838          |          | <i>Z. isolata</i>           |
|           | Env421                 | H21           | KF018839          |          | <i>Z. isolata</i>           |
|           | Env487                 | H56           | KF018834          |          | <i>Alloptes</i> sp.n.       |
|           | Env488                 | H56           | KF018835          | KJ804202 | <i>Alloptes</i> sp.n.       |
| F03p      | lack of sequence data  |               |                   |          |                             |
| F04p      | Env504                 | H12           | KF018849          |          | <i>Z. isolata</i>           |
|           | Env505                 | H2            | KF018850          |          | <i>Z. isolata</i>           |
|           | Env506                 | H31           | KF018851          |          | <i>Z. isolata</i>           |
|           | Env507                 | H16           | KF018852          | KJ804199 | <i>Z. isolata</i>           |
|           | Env508                 | H53           | KF018853          |          | <i>Z. isolata</i>           |
| F05p      | Env502                 | H4            | KF018847          |          | <i>Z. isolata</i>           |
|           | Env503                 | H1            | KF018848          |          | <i>Z. isolata</i>           |
| F07p      | Env495                 | H23           | KF018842          | KJ804200 | <i>Z. isolata</i>           |
| F08p      | Env451                 | H11           | KF018840          |          | <i>Z. isolata</i>           |
| F09p      | Env497                 | H42           | KF018843          |          | <i>Z. isolata</i>           |
|           | Env498                 | H31           | KF018844          |          | <i>Z. isolata</i>           |
|           | Env499                 | H1            | KF018825          | KJ804198 | <i>Z. isolata</i>           |
|           | Env500                 | H1            | KF018845          |          | <i>Z. isolata</i>           |
|           | Env501                 | H40           | KF018846          |          | <i>Z. isolata</i>           |
| FJ03g     | Env509                 | H33           | KF018854          |          | <i>Z. isolata</i>           |
|           | Env510                 | H20           | KF018855          |          | <i>Z. isolata</i>           |
| FJ04g     | Env425                 | H47           | KF018826          |          | <i>Z. isolata</i>           |
| FJ05g     | Env512                 | H5            | KF018856          |          | <i>Z. isolata</i>           |
|           | Env513                 | H1            | KF018823          |          | <i>Z. isolata</i>           |
|           | Env514                 | H19           | KF018857          |          | <i>Z. isolata</i>           |
|           | Env515                 | H50           | KF018858          |          | <i>Z. isolata</i>           |
| FJ06g     | Env516                 | H8            | KF018824          |          | <i>Z. isolata</i>           |
