# Supplementary material for: Differences in speciation progress in feather mites (Analgoidea) inhabiting the same host: the case of Zachvatkinia and Alloptes living on arctic and long-tailed skuas
Source: PubMed Central journal article supplement (PMC4274374; doi:10.1007/s10493-014-9856-1), 2014-10-24
Supplement: 10493_2014_9856_MOESM3_ESM.pdf [file 10493_2014_9856_MOESM3_ESM.pdf]

**Table A3. *Zachvatkinia isolata* and *Alloptes stercorarii* mites collected from the feathers of arctic skuas. M – male, F – female, T – tritonymph, P – protonymph, L – larva.**

| Sample ID | Collection date | <i>Zachvatkinia isolata</i> |    |     |    |    | <i>Alloptes stercorarii</i> |    |   |   |   |
|-----------|-----------------|-----------------------------|----|-----|----|----|-----------------------------|----|---|---|---|
|           |                 | M                           | F  | T   | P  | L  | M                           | F  | T | P | L |
| T06g      | July 2010       | 13                          | 5  | 13  | 0  | 0  | 0                           | 0  | 0 | 0 | 0 |
| T07g      | July 2010       | 2                           | 1  | 1   | 0  | 1  | 0                           | 0  | 0 | 0 | 0 |
| T08g      | July 2010       | 0                           | 0  | 0   | 0  | 0  | 0                           | 11 | 2 | 0 | 1 |
| T09g      | July 2010       | 3                           | 5  | 0   | 2  | 1  | 0                           | 0  | 0 | 0 | 0 |
| T10g      | July 2010       | 13                          | 2  | 6   | 5  | 2  | 0                           | 0  | 0 | 0 | 0 |
| T11g      | July 2010       | 2                           | 0  | 2   | 0  | 0  | 0                           | 0  | 0 | 0 | 3 |
| T12g      | July 2010       | 10                          | 9  | 6   | 10 | 3  | 0                           | 0  | 0 | 0 | 0 |
| T13g      | July 2010       | 5                           | 3  | 2   | 2  | 1  | 0                           | 0  | 0 | 0 | 0 |
| T14g      | July 2010       | 2                           | 0  | 1   | 2  | 0  | 0                           | 0  | 0 | 0 | 0 |
| T15g      | July 2010       | 7                           | 3  | 1   | 0  | 0  | 0                           | 0  | 0 | 0 | 0 |
| T16g      | July 2010       | 1                           | 1  | 1   | 0  | 0  | 0                           | 0  | 0 | 0 | 0 |
| T1p       | 30 June 2011    | 3                           | 1  | 0   | 0  | 0  | 1                           | 0  | 0 | 0 | 0 |
| T2p       | 30 June 2011    | 2                           | 0  | 1   | 0  | 0  | 0                           | 1  | 0 | 0 | 0 |
| T3p       | 30 June 2011    | 0                           | 0  | 0   | 0  | 0  | 1                           | 6  | 1 | 1 | 0 |
| T4p       | 30 June 2011    | 5                           | 1  | 6   | 0  | 0  | 0                           | 0  | 0 | 0 | 0 |
| T5p       | 2 July 2011     | 10                          | 0  | 5   | 0  | 1  | 0                           | 0  | 0 | 0 | 0 |
| T6p       | 3 July 2011     | 13                          | 1  | 5   | 0  | 0  | 0                           | 0  | 0 | 0 | 0 |
| T7p       | 4 July 2011     | 2                           | 2  | 1   | 0  | 0  | 0                           | 0  | 0 | 0 | 0 |
| T8p       | 4 July 2011     | 14                          | 5  | 7   | 8  | 1  | 0                           | 0  | 0 | 0 | 0 |
| T9p       | 6 July 2011     | 16                          | 5  | 4   | 3  | 4  | 0                           | 0  | 0 | 0 | 0 |
| T10       | 6 July 2011     | 6                           | 0  | 4   | 0  | 0  | 0                           | 0  | 0 | 0 | 0 |
| T11p      | 6 July 2011     | 23                          | 6  | 12  | 5  | 6  | 0                           | 0  | 0 | 0 | 0 |
| T12p      | 6 July 2011     | 8                           | 3  | 13  | 5  | 2  | 0                           | 0  | 0 | 0 | 0 |
| T13p      | 7 July 2011     | 15                          | 10 | 12  | 4  | 0  | 0                           | 0  | 0 | 0 | 0 |
| T14p      | 7 July 2011     | 3                           | 1  | 3   | 0  | 0  | 0                           | 0  | 0 | 0 | 0 |
|           | Total:          | 178                         | 64 | 106 | 46 | 22 | 2                           | 18 | 3 | 1 | 4 |
